# Supplementary material for: Bacterial burden in the lower airways predicts disease progression in idiopathic pulmonary fibrosis and is independent of radiological disease extent
Source: PubMed Central journal article supplement (PMC7136009; doi:10.1183/13993003.01519-2019), 2020-04-02
Supplement: ERJ-01519-2019-supplement.pdf [file ERJ-01519-2019-supplement.pdf]

## **Bacterial burden in the lower airways predicts disease progression in idiopathic pulmonary fibrosis and is independent of radiological disease extent**

**Authors:** Rachele Invernizzi<sup>1\*</sup>, Joseph Barnett<sup>1,2\*</sup>, Bhavin Rawal<sup>2</sup>, Arjun Nair<sup>3</sup>, Poonam Ghai<sup>1</sup>, Shaun Kingston<sup>1</sup>, Felix Chua<sup>2</sup>, Zhe Wu<sup>1,2</sup>, Athol U. Wells<sup>2</sup>, Elizabeth R. Renzoni<sup>2</sup>, Andrew G. Nicholson<sup>1,2</sup>, Alexandra Rice<sup>2</sup>, Clare M. Lloyd<sup>1</sup>, Adam J. Byrne<sup>1</sup>, Toby M. Maher<sup>1,2</sup>, Anand Devaraj<sup>1,2</sup> and Philip L. Molyneaux<sup>1,2</sup>.

\*Contributed equally as first authors

### **Affiliations:**

<sup>1</sup>National Heart and Lung Institute, Imperial College London, UK.

<sup>2</sup>Royal Brompton Hospital, UK.

<sup>3</sup>Department of Radiology, University College Hospital, London, UK.

**Corresponding author:** Dr Philip L. Molyneaux, Fibrosis Research Group, National Heart and Lung Institute, Imperial College London, UK. E-mail: [p.molyneaux@imperial.ac.uk](mailto:p.molyneaux@imperial.ac.uk)

### ONLINE SUPPLEMENT

#### **Results**

**Supplementary Figure S1.** Comparison between idiopathic pulmonary fibrosis (IPF) bronchoalveolar lavage (BAL) samples ( $n = 193$ ) and negative control samples ( $n = 12$ ).

**Supplementary Figure S2.** Bronchoalveolar lavage differential cell counts.

**Supplementary Figure S3.** Association between total number of leukocytes in bronchoalveolar lavage (BAL) fluid and bacterial burden.

**Supplementary Figure S4.** Association between lung function and bronchoalveolar lavage (BAL) bacterial burden.

**Supplementary Figure S5.** Bronchoalveolar lavage (BAL) bacterial burden of idiopathic pulmonary fibrosis (IPF) patients with either indeterminate or probable/definite usual interstitial pneumonia (UIP).

**Supplementary Table S1.** Information regarding specific treatments.

**Supplementary Table S2.** Bronchoalveolar lavage (BAL) differential cell counts and their prediction of BAL bacterial burden.

**Supplementary Table S3.** Agreement between two radiologist scorers measured by Cohen's kappa with squared ratings ( $k$ ) or the interclass correlation coefficient ( $icc$ ).

## Supplementary Figures and Tables

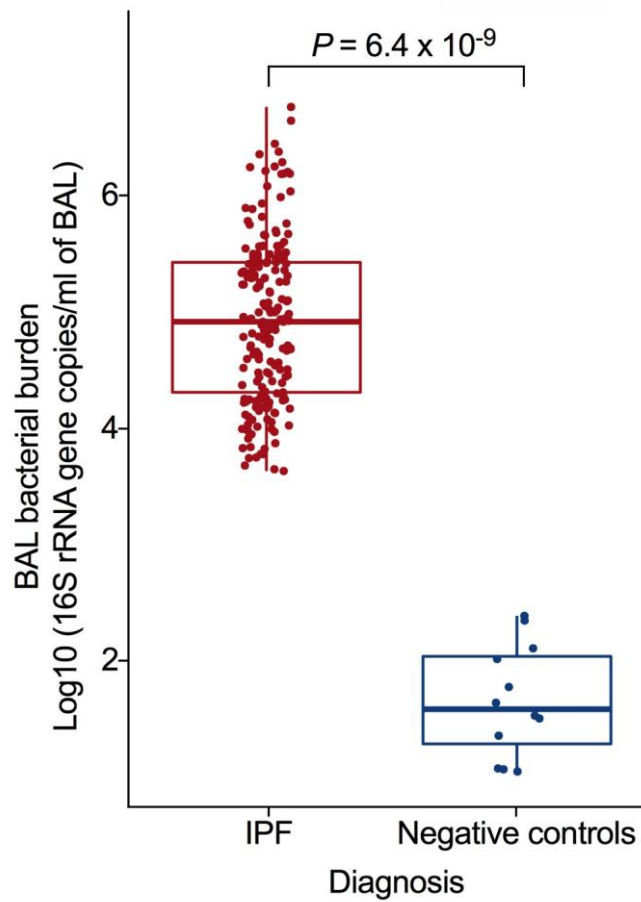

**Supplementary Figure S1. Comparison between idiopathic pulmonary fibrosis (IPF) bronchoalveolar lavage (BAL) samples ( $n = 193$ ) and negative control samples ( $n = 12$ ).** Bacterial burden calculated by qPCR and expressed as log<sub>10</sub> 16S rRNA gene copies/ml of BAL. Statistical significance tested with Mann-Whitney test.

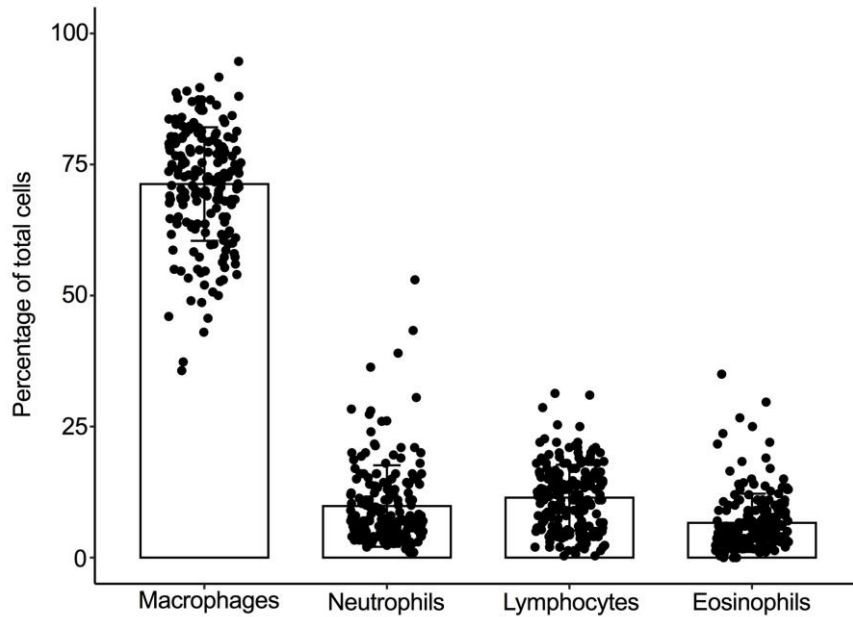

**Supplementary Figure S2. Bronchoalveolar lavage differential cell counts.** Cell counts of individuals with idiopathic pulmonary fibrosis ( $n = 193$ ) are represented as percentage of total cells. Data are presented as mean  $\pm$  standard deviation.

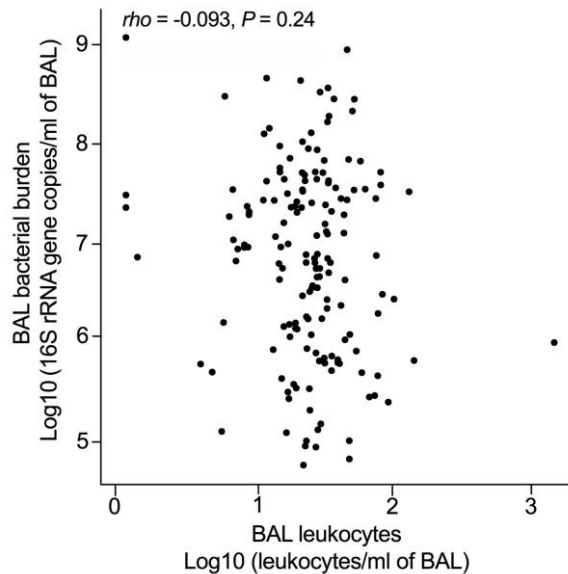

**Supplementary Figure S3. Association between total number of leukocytes in bronchoalveolar lavage (BAL) fluid and bacterial burden.** No correlation was observed between total number of leukocytes in BAL fluid and bacterial burden as measured by Spearman's  $\rho$ . Bacterial burden calculated by qPCR and expressed as log<sub>10</sub> 16S rRNA gene copies/ml of BAL. Total number of leukocytes in BAL fluid were log transformed to approximate normal distribution.

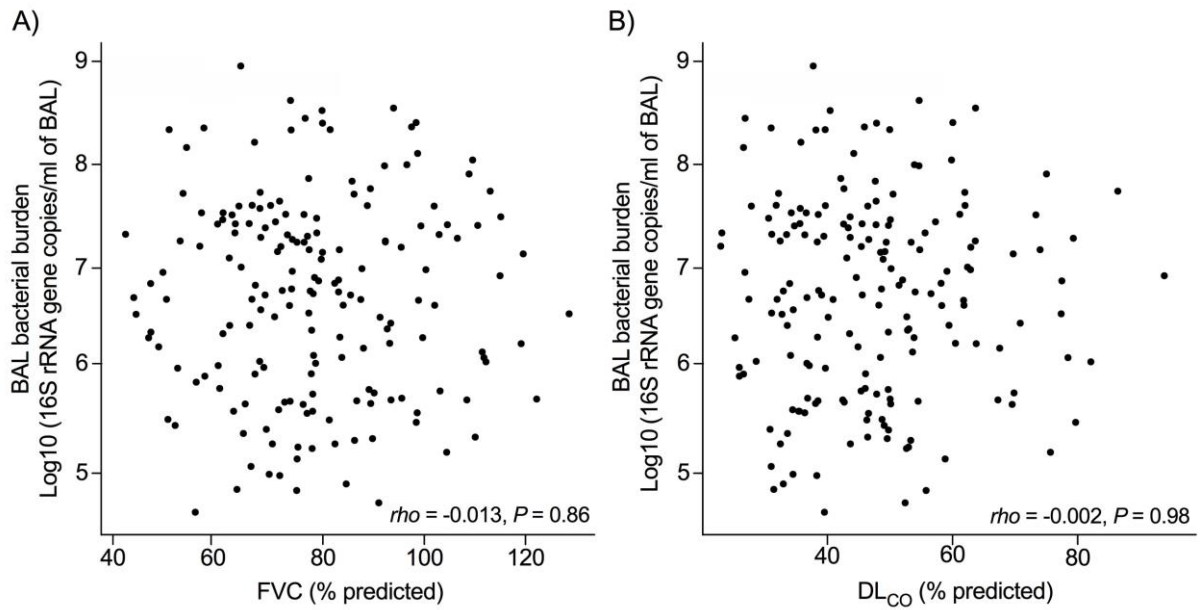

**Supplementary Figure S4. Association between lung function and bronchoalveolar lavage (BAL) bacterial burden.** No correlation was seen between bacterial burden and (A) FVC (% predicted) or (B) DL<sub>CO</sub> (% predicted) as measured by Spearman's *rho*. Bacterial burden calculated by qPCR and expressed as log<sub>10</sub> 16S rRNA gene copies/ml of BAL. FVC: forced vital capacity, DL<sub>CO</sub>: diffusing capacity of the lung for carbon monoxide.

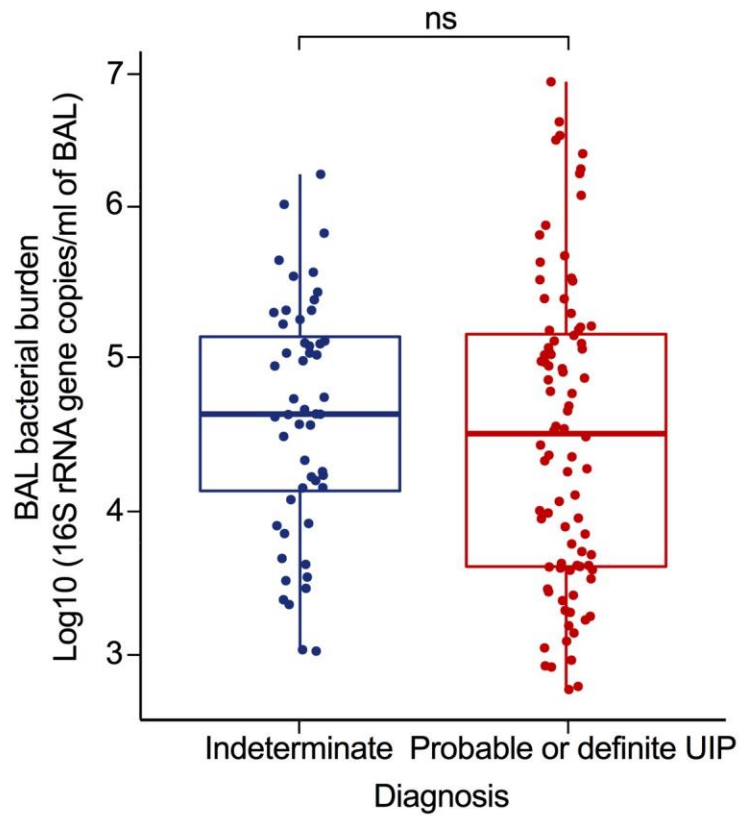

**Supplementary Figure S5. Bronchoalveolar lavage (BAL) bacterial burden of idiopathic pulmonary fibrosis (IPF) patients with either indeterminate or probable/definite usual interstitial pneumonia (UIP).** No differences ( $P = 0.328$ ) in bacterial burden were observed when comparing IPF patients with either indeterminate or probable/definite UIP. Bacterial burden calculated by qPCR and expressed as log<sub>10</sub> 16S rRNA gene copies/ml of BAL. Statistical significance tested with Mann-Whitney test.

**Supplementary Table S1.** Information regarding specific treatments.

| Treatment                                    | IPF (N = 193) |
|----------------------------------------------|---------------|
| *PPI <i>n</i> (%)                            | 97 (91)       |
| **Oral corticosteroids <i>n</i> (%)          | 21 (11)       |
| Inhaled corticosteroids <i>n</i> (%)         | 36 (19)       |
| Subsequent antifibrotic therapy <i>n</i> (%) | 67 (35)       |

IPF: idiopathic pulmonary fibrosis; PPI: proton pump inhibitor; \*PPI: 107/193 patients had concomitant gastroesophageal reflux. 97/107 patients were treated with PPI; \*\*Steroids: 21/193 patients were administered prednisolone (<10mg/day).

**Supplementary Table S2. Bronchoalveolar lavage (BAL) differential cell counts and their prediction of BAL bacterial burden.** No association was seen between BAL cell differential (percentage of total cells) and bacterial burden (*n* = 193).

|             | $\beta$ Estimate | SE    | P-value |
|-------------|------------------|-------|---------|
| Macrophages | -0.149           | 0.011 | 0.882   |
| Neutrophils | 0.043            | 0.015 | 0.966   |
| Lymphocytes | -0.076           | 0.019 | 0.940   |
| Eosinophils | 0.326            | 0.021 | 0.745   |

Univariate regression performed against log transformed 16S rRNA gene copy number. SE: standard error.

**Supplementary Table S3. Agreement between two radiologist scorers measured by Cohen's kappa with squared ratings (k) or the interclass correlation coefficient (icc).**

| <b>Variable</b>                      | <b>Agreement</b> |
|--------------------------------------|------------------|
| Fibrosis extent (icc)                | 0.49             |
| Honeycombing extent (icc)            | 0.75             |
| Traction bronchiectasis extent (icc) | 0.51             |
| UIP pattern (k)                      | 0.42             |
| PPFE (k)                             | 0.52             |

UIP: usual interstitial pneumonia; PPFE: pleuroparenchymal fibroelastosis.
